1 **Title:**

2 **Self-learning on COVID-19 among medical students and**  
3 **their preparedness to participate in government's**  
4 **COVID-19 response in Bhutan: a cross-sectional study**

5  
6  
7 **Short title:**

8 COVID-19 and medical students in South Asia

9  
10  
11 **Investigators and institution**

12 Thinley Dorji<sup>1,2</sup>, Saran Tenzin Tamang<sup>3</sup>, TVSVGK Tilak<sup>1</sup>

13  
14  
15 <sup>1</sup>Department of Internal Medicine, Armed Forces Medical College, Maharashtra University  
16 of Medical Sciences, Pune, India

17 <sup>2</sup>Kidu Mobile Medical Unit, His Majesty's People's Project, Thimphu, Bhutan

18 <sup>3</sup>Faculty of Postgraduate Medicine, Khesar Gyalpo University of Medical Sciences of  
19 Bhutan, Thimphu, Bhutan

20  
21 **Address for correspondence**

22 Email: [dorji.thinleydr@gmail.com](mailto:dorji.thinleydr@gmail.com)

23  
24 **Email address and ORCID of authors**

25 TD: [dorji.thinleydr@gmail.com](mailto:dorji.thinleydr@gmail.com) <https://orcid.org/0000-0003-4932-8704>

26 STT: [sarantenzintamang@gmail.com](mailto:sarantenzintamang@gmail.com) <https://orcid.org/0000-0003-2619-7043>

27 STT: [drtilaktvs@gmail.com](mailto:drtilaktvs@gmail.com) <https://orcid.org/0000-0002-1380-8346>

NOTE: This preprint reports new research that has not been certified by peer review and should not be used to guide clinical practice.

## 28 **Abstract**

29

30 Background: Bhutan lacks a medical school and all their medical students are trained outside  
31 in Sri Lanka, Bangladesh and India. When the COVID-19 pandemic led to closure of medical  
32 schools in these countries, the Bhutanese medical students were repatriated in March-April  
33 2020. Upon return, they were kept in government-sponsored facility quarantine for 21 days.  
34 This study assessed their knowledge on COVID-19 as a part of self-learning and attitude as  
35 part of preparedness towards participation in government's health response to COVID-19.

36

37 Method: This was a cross-sectional study among medical students who had returned to the  
38 country. This survey was conducted through an online questionnaire while the students were  
39 in 21-day facility quarantine. The sample size calculated was 129 and a convenient sampling  
40 was used. Knowledge was assessed using 20 questions, each scored 1/20. Cumulative score of  
41 score of  $\geq 80\%$  was categorized as "good knowledge", score of  $\geq 60 - 79\%$  was considered  
42 "satisfactory knowledge", and score  $< 60\%$  was considered "poor knowledge." Correlation  
43 between knowledge score and duration of clinical clerkship was tested using Pearson's  
44 correlation coefficient. Attitude of students towards their willingness to participate in the  
45 national COVID-19 response were tested using rating scales. Data were analysed using Stata  
46 13.1.

47

48 Results: 120 medical students responded to this survey (response rate = 93%). Eighty-eight  
49 (74%) had good knowledge, 28 (23%) had satisfactory knowledge and only four (3%) had poor  
50 knowledge on COVID-19. The students scored high on the symptomatology, mode of  
51 transmission, prevention and treatment options and on local epidemiology; and scored low on  
52 the forms of mechanical ventilations and on the home-management of non-critical cases. The  
53 knowledge score correlated with duration of clinical clerkship ( $r = 0.326$ ,  $p = 0.001$ ). The  
54 primary source of information were social media sites (102, 85%), television (94, 78%) and  
55 newspapers (76, 63%). The majority (78, 65%) were willing to participate in the government's  
56 COVID-19 response but could not identify what roles they could play. The fear of contracting  
57 COVID-19 was reported in only in 8.7%.

58

59 Conclusions: The medical students had good knowledge on COVID-19 and were self-learned  
60 through social media, television and newspapers. The students held positive attitude towards  
61 participation in the government's COVID-19 response.

62

63 Keywords: medical education; medical school; online learning; social media; pandemic

## 64 Introduction

65

66 The COVID-19 pandemic has brought an extraordinary situation across all walks of life and in  
67 the delivery of medical education [1]. In an effort to maintain social distancing and prevent  
68 community spread, countries have closed schools and colleges [2,3]. In South Asia, even before  
69 lockdown in India was announced in March 2020, schools and colleges including medical  
70 schools were closed. While some regulatory bodies have called for early graduation and  
71 registration of medical students to meaningful participation in the present pandemic, others  
72 have cautioned against taking up roles beyond their competence [2,4,5]. In Italy, at the height  
73 of health crisis when health system that was overwhelmed, medical students were fast tracked  
74 and recruited as doctors [6]. The urgency to recruit young health workers in the ongoing  
75 pandemic is also due to higher complication rates and mortality reported among elderly  
76 healthcare workers [5,6]. This has led to a tension between safeguarding education and  
77 responding to the demands on health service [7].

78

79 The pandemic situation has brought significant changes to medical education and particularly  
80 their transition from student to doctors [7,8]. With clinical rotations cancelled, students have  
81 reported reduced confidence and preparedness to work as doctors [7]. The online teaching-  
82 learning has been rapidly adopted across many colleges and institutions and has been  
83 particularly useful to those institutions with international students who returned to their native  
84 homes [9,10]. However, this is not served as a substitute for clinical exposure, clinical  
85 experience and collaborative learning opportunities [3]. The pandemic has delayed the  
86 graduation or licencing examinations of many students and this has a bearing on their  
87 subsequent applications for residency and postgraduate training programmes and the overall  
88 educational trajectory [7,11,12]. The disruption of medical education also has financial  
89 implications on the cost incurred for training and is a cause of anxiety in a significant proportion  
90 of students requiring mental health support [3,13].

91

92 Bhutan is a small country of population 0.79 million in the eastern Himalayas [14]. The Royal  
93 Government provides healthcare free of cost at all levels [15]. However, with a doctor-patient  
94 ratio of 5 per 10,000 population and with no medical colleges in the country, Bhutan still faces  
95 shortage of doctors and is dependent on the medical colleges in South Asia to train all of its

96 doctors [15]. Presently, Bhutan has more than 180 medical students studying across Sri Lanka,  
97 Bangladesh and India [16].

98

99 After Bhutan reported its first case of COVID-19 in a tourist [17], the Royal Government took  
100 a decisive action to re-call forty-six postgraduate doctors studying outside the country [18] and  
101 more than 100 medical students studying in Sri Lanka, Bangladesh, Thailand and India [19].  
102 Upon their return, like thousands of other Bhutanese who were evacuated to Bhutan, these  
103 doctors and medical students were kept in mandatory 21-day facility quarantine in hotels [20].  
104 This study assessed the knowledge of medical students on COVID-19, the sources of  
105 information and their attitude towards participation in health response to COVID-19 in the  
106 country.

107

108

## 109 **Research method**

### 110 **Study design**

111 This was a cross-sectional study among Bhutanese medical students.

112

### 113 **Setting**

#### 114 **General setting**

115 Bhutan is a small country situated in the eastern Himalayas with a population of 0.7 million.  
116 Healthcare is provided free of cost at all levels, guided by the National Health Policy 2011  
117 within the broader framework of overall national development and pursuit of happiness [21].  
118 Healthcare is provided through a three-tiered system: primary health centres and 10-bedded  
119 hospitals at the primary healthcare level, district and general hospitals at secondary level, and  
120 referral hospitals with specialist services at the tertiary level. The three referral centres are  
121 located in geographically strategic locations in the west, east and the central regions. Specific  
122 COVID-19 management hospitals were designated across the country while the majority of the  
123 confirmed cases were treated at the Jigme Dorji Wangchuck National Referral Hospital,  
124 Thimphu.

125

#### 126 **Health human resources in Bhutan**

127 Modern health system in Bhutan began in 1956 and there has been shortage of health human  
128 resources, particularly doctors [15,18,22]. All of Bhutan's doctors are trained in other  
129 countries; all are employed by the Royal Civil Service Commission as the healthcare system is  
130 fully run by the government (no private practice is allowed). In 2020, there were 376 doctors  
131 in Bhutan with particular shortage of specialist doctors [23]. As of 2019, there are  
132 approximately 180 Bhutanese medical students in Sri Lanka, Bangladesh and India [16]. These  
133 students are fully or partially funded by the Royal Government while some are privately  
134 funded. The duration of undergraduate medical training is five years in Sri Lanka and four  
135 years in Bangladesh and India, followed by one year internship programme. The students can  
136 take up internship programme offered by the Faculty of Postgraduate Medicine, Khesar Gyalpo  
137 University of Medical Sciences of Bhutan at three tertiary hospitals in Bhutan.

138

139 As of March-April 2020, more than 100 medical students had returned to Bhutan [19]. As per  
140 the Royal Government of Bhutan's COVID-19 response, these students were kept in  
141 government-sponsored mandatory facility quarantine in hotels in Paro and Thimphu  
142 dzongkhags for 21 days [20]. While in quarantine, persons returning from abroad were  
143 monitored daily for symptoms of COVID-19 and tested with RT-PCR if symptomatic and all  
144 were tested with rapid-antibody test at the end of quarantine period.

145

146

## 147 **Study site and study population**

148 This study was conducted via online survey among medical students were in facility-quarantine  
149 in Paro and Thimphu *dzongkhags*.

150

151

## 152 **Sample size and sampling**

153 For sample size calculation, we assumed that 50% of the respondents would have good  
154 knowledge on COVID-19. The sample size was calculated for proportions considering a 95%  
155 confidence level, 0.05 margin of error and finite correction for student population of 180 [16].  
156 Allowing for a 5% dropout rate, the final sample size was 129. In the absence of the proper list  
157 of medical students coming into the country from various colleges and countries, convenience  
158 sampling was used.

159

160

## 161 **Study tool**

162 The study questionnaire was designed to collect the respondent's basic information, assessment  
163 of their knowledge and attitude and their source of information. The study tool was reviewed  
164 by seven national experts on COVID-19 for its content and construct validity and quality of  
165 multiple choice questions. As a result of this exercise, two items were revised and seven items  
166 were dropped. The S-CVI for the revised questionnaire was 0.96.

167

168 Knowledge is tested using twenty multiple choice questions. The knowledge was assessed  
169 under the following domains: disease definition, causative agent, symptomatology, mode of  
170 transmission and incubation period, clinical course of disease, diagnostic tests and centres in  
171 the country where these tests were available, case management and mortality rate, preventive  
172 measures, global and local epidemiology of COVID-19 and the national hotline number for  
173 COVID-19 related information and issues. We also assessed the common sources of COVID-  
174 19. Attitude was tested using rating scales against given statements on their willingness and  
175 fear to participate in COVID-19 responses, what role they would play and if medical students  
176 can make meaningful contributions in the pandemic settings in Bhutan. We also assessed if the  
177 students had received training on the use of personal protective equipment for COVID-19 care  
178 at their colleges.

179

180

## 181 **Data collection**

182 Data were collected using Google Forms that were emailed to the students through their student  
183 representatives. Online data collection allowed social distancing at a time when quarantine  
184 facilities were out of bound for visitors.

185

186

## 187 **Data processing and analysis**

188 The data were extracted from Google Forms and analysed in STATA Version 13.1 (StataCorp,  
189 Stata Statistical Software). Each knowledge question was scored 1/20. A cumulative score of  
190  $\geq 80\%$  was categorized as "good knowledge", score of  $\geq 60 - 79\%$  was considered "satisfactory  
191 knowledge", and score  $< 60\%$  was considered "poor knowledge." Correlation between  
192 knowledge score and duration of clinical clerkship was tested using Pearson's correlation

193 coefficient. Results with  $p$ -value less than 0.05 were considered significant. Themes around  
194 attitude of students towards their willingness to participate in the national COVID-19 response  
195 are presented as frequencies and percentages.

196  
197

## 198 **Ethics considerations**

199 Ethics approval was obtained from the Research Ethics Board of Health, Ministry of Health,  
200 Bhutan. Informed consent was taken from the study participants as per the consent process  
201 approved by the ethics committee. For confidentiality, the data were anonymized and only the  
202 pooled/aggregate results are presented.

203  
204

## 205 **Results**

206 There were 120 medical students who responded to survey questionnaire (response rate =  
207 93%). The mean age was 22 ( $\pm 2$ ) years; the proportion of students were distributed almost  
208 equally across first to fifth year of study; the median duration of clinical clerkship attended was  
209 8 months (IQR 1, 18 months). The basic profile of the students and the country of study is  
210 shown in Table 1.

211

212 **Table 1. Basic profile of Bhutanese medical students studying Bachelor of**  
213 **Medicine and Bachelor of Surgery (MBBS) in Sri Lanka, Bangladesh and India**  
214 **surveyed for the COVID-19 KA study, April 2020**

215

| <b>Basic characteristics</b> | <b>n</b> | <b>(%)</b> |
|------------------------------|----------|------------|
| Sex                          |          |            |
| Female                       | 89       | (74)       |
| Male                         | 31       | (26)       |
| Country of study             |          |            |
| Sri Lanka                    | 85       | (71)       |
| Bangladesh                   | 30       | (25)       |
| India                        | 5        | (4)        |
| Year of study                |          |            |



|                                                     |     |       |
|-----------------------------------------------------|-----|-------|
| First year                                          | 23  | (19)  |
| Second year                                         | 20  | (17)  |
| Third year                                          | 30  | (25)  |
| Fourth year                                         | 22  | (18)  |
| Fifth year                                          | 25  | (21)  |
| Study sponsor                                       |     |       |
| Full government sponsored                           | 56  | (47)  |
| Partial government sponsored                        | 46  | (38)  |
| Private sponsored                                   | 18  | (15)  |
| Trained on the use of personal protective equipment |     |       |
| Yes                                                 | 5   | (4)   |
| No                                                  | 116 | (96%) |

216

217

218

## 219 **Knowledge on COVID-19**

220 Eighty-eight students (74%) had good knowledge, 28 (23%) had satisfactory knowledge and  
 221 only four (3%) had poor knowledge on COVID-19. The students scored high on the  
 222 symptomatology, mode of transmission, prevention and treatment options and on factors of  
 223 local epidemiology such as all cases being imported, select centres with RT-PCR facilities and  
 224 local COVID-19 hotlines. The students scored the lowest on the forms of mechanical  
 225 ventilations and on the World Health Organization policy of home-management of non-critical  
 226 COVID-19 cases. The knowledge score was significantly correlated with duration of clinical  
 227 clerkship ( $r = 0.326$ ,  $p = 0.001$ ) and not related to sex, age or country of study. The details on  
 228 knowledge score is shown in Table 2.

229

230 **Table 2. Assessment of knowledge on COVID-19 among Bhutanese medical**  
 231 **students studying Bachelor of Medicine and Bachelor of Surgery (MBBS) in Sri**  
 232 **Lanka, Bangladesh and India surveyed for the COVID-19 KA study, April 2020\***

233

| <b>Knowledge questions</b> | <b>Correct response</b> | <b>Incorrect response</b> |
|----------------------------|-------------------------|---------------------------|
|----------------------------|-------------------------|---------------------------|

|                                                                                                                  | <b>n</b> | <b>(%)</b> |    |      |
|------------------------------------------------------------------------------------------------------------------|----------|------------|----|------|
| What is COVID-19?                                                                                                | 108      | (90)       | 12 | (10) |
| What causes COVID-19?                                                                                            | 110      | (92)       | 10 | (8)  |
| What are the most common symptoms of COVID-19?                                                                   | 118      | (98)       | 2  | (2)  |
| A person who is asymptomatic may transmit the COVID-19 virus.                                                    | 117      | (97)       | 3  | (3)  |
| How long is the incubation of COVID-19?                                                                          | 104      | (87)       | 16 | (13) |
| Which of the following is the MOST COMMON mode of COVID-19 transmission?                                         | 104      | (87)       | 16 | (13) |
| All the COVID-19 cases that were reported in Bhutan were imported cases.                                         | 119      | (99)       | 1  | (1)  |
| How is diagnosis of COVID-19 confirmed?                                                                          | 98       | (82)       | 22 | (18) |
| As of April 2020, which of the following centres DOES NOT have a RT-PCR testing facility for COVID-19?           | 102      | (85)       | 18 | (15) |
| Which of the following has correctly matched the proportion of patients with the severity of COVID-19 infection? | 99       | (83)       | 21 | (17) |
| Which one of the following is an approved treatment for COVID-19?                                                | 89       | (74)       | 31 | (26) |
| Which one of the following is NOT a part of mechanical ventilation?                                              | 22       | (18)       | 98 | (82) |
| What is the range of death rates reported due to COVID-19?                                                       | 108      | (90)       | 12 | (10) |
| Patients with COVID-19 can be managed at home if the infection is non-severe.                                    | 65       | (54)       | 55 | (46) |
| What is the quarantine period recommended by World Health Organization for a primary contact?                    | 111      | (93)       | 9  | (7)  |
| Which one of the following is the most important measure to prevent COVID-19 infection?                          | 100      | (83)       | 20 | (17) |
| All of the following are means to limit social interaction, EXCEPT                                               | 106      | (88)       | 14 | (12) |

|                                                                                                                                       |     |      |    |      |
|---------------------------------------------------------------------------------------------------------------------------------------|-----|------|----|------|
| In providing care for patients with COVID-19, which one of the following is the most important protective measure for health workers? | 105 | (88) | 15 | (12) |
| All of the following are identified at-risk groups for severe illness with COVID-19, EXCEPT                                           | 100 | (83) | 20 | (17) |
| What is the toll-free number for COVID-19 related information centre in Bhutan?                                                       | 95  | (79) | 25 | (21) |

234 \*The study questionnaire can be viewed in the Supplementary material.

235

236

237 The sources of information were social media sites – Facebook pages of the Ministry of Health  
 238 (102, 85%) and the Prime Minister’s Office (80, 67%), television (94, 78%) and newspapers  
 239 (76, 63%). Less than half of the students reported reading scientific journals for information  
 240 (52, 43%). Only a quarter of the students (31, 26%) had attended lectures/symposia on COVID-  
 241 19 at their colleges. The details of the sources of COVID-19 information are shown in Table  
 242 3.

243

244 **Table 3. Sources of knowledge on COVID-19 reported by Bhutanese medical**  
 245 **students studying Bachelor of Medicine and Bachelor of Surgery (MBBS) in Sri**  
 246 **Lanka, Bangladesh and India surveyed for the COVID-19 KA study, April 2020**

247

248

| Sources of knowledge                    | n   | (%)  |
|-----------------------------------------|-----|------|
| Facebook page – Ministry of Health      | 102 | (85) |
| Television                              | 94  | (78) |
| Facebook page – Prime Minister’s Office | 80  | (67) |
| Newspapers                              | 76  | (63) |
| Health professionals                    | 70  | (58) |
| Scientific journals                     | 52  | (43) |
| Lectures/symposium                      | 31  | (26) |
| Family members                          | 30  | (25) |
| Others                                  | 8   | (7)  |

249

250  
251  
252  
253  
254  
255  
256  
257  
258  
259  
260  
261  
262  
263  
264  
265  
266  
267

## Attitude towards participation in COVID-19 response in the country

The majority (78, 65%) responded that they should participate in the government’s COVID-19 response and were willing to serve (92, 77%) in any part of the country. However, the students could not identify what roles they could play: clinical work (19, 16%) or advocacy and communications (33, 37%) but half of them felt that they may not make meaningful contributions in the COVID-19 response (57, 48%). The fear of contracting COVID-19 was reported in only a small proportion of students (8 7%). The details of the ratings on attitude statements are shown in Table 4.

**Table 4. Attitude towards participation in COVID-19 response among Bhutanese medical students studying Bachelor of Medicine and Bachelor of Surgery (MBBS) in Sri Lanka, Bangladesh and India surveyed for the COVID-19 KA study, April 2020**

| Attitude statements                                                                                                   | Agree |      | Neutral |      | Disagree |      |
|-----------------------------------------------------------------------------------------------------------------------|-------|------|---------|------|----------|------|
|                                                                                                                       | n     | (%)  | n       | (%)  | n        | (%)  |
| Medical students should participate in the COVID-19 response.                                                         | 78    | (65) | 41      | (34) | 1        | (1)  |
| Medical students should be assigned only clinical work (taking care of patients) during the COVID-19 response effort. | 19    | (16) | 17      | (14) | 84       | (70) |
| Medical students should only work in communication and advocacy in the community on COVID-19 instead of the hospital. | 33    | (37) | 62      | (52) | 25       | (21) |
| I am willing to serve in any part (rural/urban) of the country wherever                                               | 92    | (77) | 24      | (20) | 3        | (3)  |

|                                                                                                          |    |      |    |      |    |      |
|----------------------------------------------------------------------------------------------------------|----|------|----|------|----|------|
| required during the COVID-19 response effort.                                                            |    |      |    |      |    |      |
| In the current settings, medical students cannot make meaningful contributions in the COVID-19 response. | 16 | (13) | 47 | (39) | 57 | (48) |
| I am afraid that I might get COVID-19 if I visit the hospital.                                           | 8  | (7)  | 47 | (39) | 65 | (54) |

268

269

270

## 271 Discussion

### 272 Knowledge on COVID-19

273 The overall knowledge on COVID-19 was high amongst Bhutanese medical students studying  
 274 in the three South Asian countries: Sri Lanka, Bangladesh and India. The students knew about  
 275 the symptoms, mode of transmission, causative agent, confirmation of diagnosis and preventive  
 276 measures. The students had good knowledge on the local epidemiology in Bhutan – cases being  
 277 imported ones, the regional centres where RT-PCR facilities were available and the national  
 278 COVID-19 hotline number. The knowledge was poor on options identifying the types of  
 279 mechanical ventilation and that World Health Organization recommendation on home-based  
 280 management of non-severe cases.

281

282 As the wave of the pandemic spread across South Asia, our study reflects the trend of medical  
 283 learning among students from three countries when the pandemic disrupted their medical  
 284 education. The learning pattern reported reflects a unique trend where social media information  
 285 have contributed to more learning than conventional means such as lectures/symposia or the  
 286 scientific literature. The majority of the students reported social media, television and  
 287 newspapers as the source of information. This is similar to a survey involving 1404 medical  
 288 students in Jordan and 1541 medical students in Turkey where the majority relied on online  
 289 sources and social media platform for COVID-19 related information [11,24]. In Bhutan, the  
 290 official Facebook page of the Ministry of Health and the Prime Minister’s Office carried  
 291 information that were designed by their medical teams. This demonstrates the increasing  
 292 usefulness of real-time sharing of information to students and knowledge transfer through  
 293 social media [11,25]. The consumption of scientific journals (43%) was relatively higher than

294 27% reported among students in Jordan [24]. At the time of this study, most of the medical  
295 colleges had not initiated online lectures and only a quarter of the students had received  
296 information through their teachers.

297

298 Medical students are future healthcare providers and need comprehensive knowledge on both  
299 the clinical and public health management of emerging and re-emerging diseases. This study  
300 demonstrated that students had self-sufficiency and were able to self-learn adequate knowledge  
301 on a topic that was new and in a scenario that was hitherto not faced. Integration of learning  
302 with online tools goes beyond traditional roles of students [25,26] and is an important attribute  
303 adaptation to becoming successful doctors for the 21<sup>st</sup> century [11,27]. However, as the World  
304 Health Organization has cautioned, medical students must learn to assess the reliability of the  
305 source of information at times of infodemic with many unregulated contents available online  
306 [28].

307

308

### 309 **Attitude towards engagement in COVID-19 activities**

310 The students held positive attitudes towards participation in the national COVID-19 response.  
311 This is similar to findings from a survey of 179 medical students in Singapore where two-thirds  
312 reported that it was their professional responsibility to be a part of the medical team and  
313 participate in clinical activities in hospitals [29]. It has been suggested that in places where  
314 there are acute shortages, the medical students may be tasked with care of routine patients to  
315 free the other health workers for COVID-19 management [5,6]. In our study, however, the  
316 students could not identify whether they should shoulder clinical job responsibilities or take on  
317 communications and advocacy work and only 13% believed that they can make meaningful  
318 contributions. In a study in Turkey, a quarter of the students (24.3%) reported that they are not  
319 competent by any means to handle clinical responsibilities where as others reported that they  
320 would be happy to work in the emergency department [11]. Therefore, engagement of medical  
321 students in healthcare settings advisable only after thorough assessment of student's readiness  
322 and the severity of needs and shortages in the system. It is suggested that medical students can  
323 assist with routine outpatient clinical care, care of chronic patients and routine antenatal checks  
324 of pregnant women. Many of these task can be performed via telemedicine and involves no  
325 risk of infectious transmission [26]. Advanced medical students may be engaged in inpatient  
326 care [26].

327

328 One of the reasons that may deter medical students from returning to clinical settings is their  
329 fear of contracting COVID-19. Among medical students, fear was reported in 1.3% medical  
330 students in Turkey and anxiety in 24.9% of medical students in a study in China [11,13]. In our  
331 study, 7% of students reported fear of contracting COVID-19. In our survey, fear was assessed  
332 against a single rating statement while instruments such as FCoV-19S, validated among  
333 medical students in Vietnam was not available at the time of data collection [30].

334

335

### 336 **Preparedness of medical students in clinical engagement**

337 The involvement of medical students in clinical roles in the COVID-19 pandemic varies across  
338 countries and their regulatory bodies. Many have argued that medical students are not certified  
339 practitioners, increases the risk of exposure and consumption of PPEs and might act as  
340 additional vectors for viral transmission [11,26]. The proportion of medical students who  
341 received training on the use of personal protective equipment was very low: 4% in our study,  
342 and 7% among final year students in Turkey [11]. If the government were to engage medical  
343 students in clinical settings, proper inductions, training on training on the infection control  
344 measures and the use of PPEs and clear guidance on working within their competencies are  
345 required [7,31]. It is suggested that medical students be given targeted volunteering  
346 opportunities that supplement their educational needs and specific learning objectives [7].  
347 Experience from Denmark shows that after adequate training on infection control and emphasis  
348 on the role of medical students in the pandemic emergency healthcare workforce, two thirds of  
349 students had volunteered to work in pandemic emergency departments [31].

350

351

### 352 **Impact of COVID-19 on medical education of Bhutanese students**

353 As the wave of this pandemic spread across the globe, colleges and universities have  
354 implemented various strategies to provide medical education. While some medical colleges  
355 have engaged their students through online teaching platforms [32], some have been left  
356 without any engagement. While some are concerned over loss of academic year and would  
357 want to return to their colleges, some remain reluctant. In an assessment of student's preference  
358 to return to clinical work in Singapore, one third of medical students perceived high personal  
359 risk of infection and preferred not to return to clinical education settings [29].

360

361 For Bhutan, the disruption of undergraduate medical education has major impact on the supply  
362 of doctors. Bhutan is dependent on the yearly supply of these medical graduates to address to  
363 the need of the country and the expanding medical services. With these medical students likely  
364 to take additional time to graduate, it would entail additional cost in training them to obtain the  
365 MBBS degree. This would delay their Royal Civil Service examinations and their entry into  
366 service and subsequently residency training programme in later years. Such impacts and  
367 disruption in the medical education and certification of doctors have reported an increase in  
368 anxiety and mental health issues among medical students during the pandemic period [3,8].

369

370 One option for these students in Bhutan is to allow clinical clerkships in the teaching hospitals  
371 in Bhutan, as were done during events of disruptions of clinical clerkships in the US [8]. They  
372 may be accommodated in the three teaching hospitals in the country: Jigme Dorji Wangchuck  
373 National Referral Hospital, Thimphu; Central Regional Referral Hospital, Gelephu; and  
374 Eastern Regional Referral Hospital, Monggar. However, with these hospitals are designed as  
375 teaching hospitals for only postgraduate students and are currently engaged in activities as they  
376 serve as COVID-19 focal hospitals. As a result, many of the students have remained unengaged  
377 in clinical settings.

378

379 The scenario of medical education has rapidly evolved with adoption of online teaching-  
380 learning tools as a means of social distancing [9] while several colleges have adopted and  
381 approved online assessment [7,32]. In the wake of national lockdowns and ban on international  
382 travel, the Sri Lanka Medical Council approved the award of MBBS degrees of students who  
383 gave their theory and clinical examination conducted online at the Khesar Gyalpo University  
384 of Medical Sciences of Bhutan, Thimphu and assessed by their teachers in respective colleges.

385

386

## 387 **Study limitations**

388 As the scenario of COVID-19 situation progressed in South Asia and in Bhutan, the perception  
389 of these medical students might have changed over time. This paper was an attempt to  
390 understand their knowledge and attitude towards their participation in COVID-19 response in  
391 the context of Bhutan.

392



393

## 394 **Conclusion**

395 The medical students had good knowledge on COVID-19 and the source of information were  
396 mostly social media online content. The students had positive attitude towards participating in  
397 the COVID-19 national response but did not identify any specific roles in which they can make  
398 meaningful contributions.

399

400

## 401 **References**

- 402 1. World Health Organization. WHO Director-General's opening remarks at the media  
403 briefing on COVID-19 - 11 March 2020 [Internet]. 2020 [cited 10 Apr 2020].  
404 Available: <https://www.who.int/dg/speeches/detail/who-director-general-s-opening-remarks-at-the-media-briefing-on-covid-19---11-march-2020>  
405
- 406 2. Iacobucci G. Covid-19: medical schools are urged to fast-track final year students.  
407 BMJ. England; 2020;368: m1064. doi:10.1136/bmj.m1064
- 408 3. Chandratre S. Medical Students and COVID-19: Challenges and Supportive Strategies.  
409 J Med Educ Curric Dev. 2020;7: 2382120520935059. doi:10.1177/2382120520935059
- 410 4. Harvey A. Covid-19: medical students should not work outside their competency, says  
411 BMA. BMJ. England; 2020;368: m1197. doi:10.1136/bmj.m1197
- 412 5. Stokes DC. Senior Medical Students in the COVID-19 Response: An opportunity to be  
413 proactive. Acad Emerg Med. United States; 2020; doi:10.1111/acem.13972
- 414 6. Di Donato V, McKenzie S. Fresh out of medical school, young Italian doctors are  
415 being fast-tracked to the coronavirus frontline [Internet]. 2020 [cited 10 Apr 2020].  
416 Available: <https://edition.cnn.com/2020/03/30/europe/italy-young-doctors-coronavirus-intl/index.html>  
417
- 418 7. Choi B, Jegatheeswaran L, Minocha A, Alhilani M, Nakhoul M, Mutengesa E. The  
419 impact of the COVID-19 pandemic on final year medical students in the United  
420 Kingdom: a national survey. BMC Med Educ. 2020;20: 206. doi:10.1186/s12909-020-  
421 02117-1
- 422 8. Akers A, Blough C, Iyer MS. COVID-19 Implications on Clinical Clerkships and the  
423 Residency Application Process for Medical Students. Cureus. 2020;12: e7800.  
424 doi:10.7759/cureus.7800
- 425 9. Karunathilake IM, Dissanayake VHW, Yasawardena S, Abegunawardena A, Raviraj

- 426 S, Wijesinghe PS, et al. The new normal of medical education - challenges and  
427 opportunities. *South-East Asian J Med Educ.* 2020;14: 1–5.  
428 doi:<http://doi.org/10.4038/seajme.v14i1.241>
- 429 10. Sandhu P, de Wolf M. The impact of COVID-19 on the undergraduate medical  
430 curriculum. *Medical education online.* 2020. p. 1764740.  
431 doi:[10.1080/10872981.2020.1764740](https://doi.org/10.1080/10872981.2020.1764740)
- 432 11. Çalışkan F, Mıdık Ö, Baykan Z, Şenol Y, Tanrıverdi EÇ, Tengiz Fİ, et al. The  
433 knowledge level and perceptions toward COVID-19 among Turkish final year medical  
434 students. *Postgrad Med.* Taylor & Francis; 2020;0: 1–9.  
435 doi:[10.1080/00325481.2020.1795486](https://doi.org/10.1080/00325481.2020.1795486)
- 436 12. Gabrielson AT, Kohn JR, Sparks HT, Clifton MM, Kohn TP. Proposed Changes to the  
437 2021 Residency Application Process in the Wake of COVID-19. *Acad Med.* 2020;  
438 doi:[10.1097/ACM.00000000000003520](https://doi.org/10.1097/ACM.00000000000003520)
- 439 13. Cao W, Fang Z, Hou G, Han M, Xu X, Dong J, et al. The psychological impact of the  
440 COVID-19 epidemic on college students in China. *Psychiatry Res.* 2020;287: 112934.  
441 doi:[10.1016/j.psychres.2020.112934](https://doi.org/10.1016/j.psychres.2020.112934)
- 442 14. National Statistics Bureau of Bhutan. 2017 Population & Housing Census of Bhutan -  
443 National Report. Thimphu; 2018.
- 444 15. Thinley S, Tshering P, Wangmo K, Wangchuk N, Dorji T, Tobgay T, et al. The  
445 Kingdom of Bhutan Health System Review. *Health Syst Transit.* 2017;7.
- 446 16. Ministry of Education. Annual Education Statistics 2019. 31st ed. Thimphu: Ministry  
447 of Education, Royal Government of Bhutan; 2019.
- 448 17. LeVine S, Dhakal GP, Penjor T, Chuki P, Namgyal K, Tshokey, et al. Case Report:  
449 The First Case of Novel Coronavirus Disease (COVID-19) in Bhutan. *Am J Trop Med*  
450 *Hyg.* United States; 2020; doi:[10.4269/ajtmh.20-0259](https://doi.org/10.4269/ajtmh.20-0259)
- 451 18. Dorji T, Lucero-Prisno III DE. Recalling doctors back to Bhutan for COVID-19. *Popul*  
452 *Med.* 2020;2. doi:[10.18332/popmed/125913](https://doi.org/10.18332/popmed/125913)
- 453 19. Dem P. Medical students share views on 3-week quarantine period [Internet]. 2020  
454 [cited 9 Apr 2020]. Available: <https://drukson.com/medical-students-share-views-on-3-week-quarantine-period/>
- 455
- 456 20. Tshokey T. An update on COVID-19 in Bhutan. *Bhutan Heal J.* 2020;6: III.
- 457 21. Ministry of Health. National Health Policy, Bhutan. Thimphu: Ministry of Health,  
458 Royal Government of Bhutan; 2011.
- 459 22. Dorji T, Melgaard B. Medical History of Bhutan: A chronicle of health and disease

- 460 from Bon times to today. 2nd ed. Centre for Research Initiatives; 2018.
- 461 23. Ministry of Health. Annual Health Bulletin 2019. Thimphu: Ministry of Health, Royal  
462 Government of Bhutan; 2019.
- 463 24. Khasawneh AI, Humeidan AA, Alsulaiman JW, Bloukh S, Ramadan M, Al-Shatanawi  
464 TN, et al. Medical Students and COVID-19: Knowledge, Attitudes, and Precautionary  
465 Measures. A Descriptive Study From Jordan. *Front public Heal.* 2020;8: 253.  
466 doi:10.3389/fpubh.2020.00253
- 467 25. Chan TM, Dzara K, Dimeo SP, Bhalerao A, Maggio LA. Social media in knowledge  
468 translation and education for physicians and trainees: a scoping review. *Perspect Med*  
469 *Educ.* 2020;9: 20–30. doi:10.1007/s40037-019-00542-7
- 470 26. Miller DG, Pierson L, Doernberg S. The Role of Medical Students During the COVID-  
471 19 Pandemic. *Annals of internal medicine.* 2020. pp. 145–146. doi:10.7326/M20-1281
- 472 27. Tenzin K, Karunatilaka IM, Rimal J, Wangdi P, Gyamtsho S, Tobgay T, et al. The  
473 making of 21st century doctors of Bhutan; use of artificial intelligence, big data and  
474 values appropriate for the new normal in the 21st century. *South-East Asian J Med*  
475 *Educ.* 2020;14: 6–9. doi:http://doi.org/10.4038/seajme.v14i1.242
- 476 28. Zarocostas J. How to fight an infodemic. *Lancet.* Elsevier; 2020;395: 676.  
477 doi:10.1016/S0140-6736(20)30461-X
- 478 29. Compton S, Sarraf-Yazdi S, Rustandy F, Radha Krishna LK. Medical students’  
479 preference for returning to the clinical setting during the COVID-19 pandemic. *Med*  
480 *Educ.* 2020; doi:10.1111/medu.14268
- 481 30. Nguyen HT, Do BN, Pham KM, Kim GB, Dam HTB, Nguyen TT, et al. Fear of  
482 COVID-19 Scale-Associations of Its Scores with Health Literacy and Health-Related  
483 Behaviors among Medical Students. *Int J Environ Res Public Health.* 2020;17.  
484 doi:10.3390/ijerph17114164
- 485 31. Rasmussen S, Sperling P, Poulsen MS, Emmersen J, Andersen S. Medical students for  
486 health-care staff shortages during the COVID-19 pandemic. *Lancet (London,*  
487 *England).* 2020. pp. e79–e80. doi:10.1016/S0140-6736(20)30923-5
- 488 32. Birch E, de Wolf M. A novel approach to medical school examinations during the  
489 COVID-19 pandemic. *Med Educ Online.* United States; 2020;25: 1785680.  
490 doi:10.1080/10872981.2020.1785680
- 491
- 492

## 493 **Data availability statement**

494 The data used for this study is available as supplementary file (dta).

495

## 496 **Declaration of interest**

497 The authors declare that there are no competing interests.

498

## 499 **Financial/material support**

500 There is no financial or material support for this study.

501

## 502 **Acknowledgements**

503 The authors are grateful to the medical students who responded to the survey.

504

## 505 **Authors' contributions**

506 TD, STT and TVSVGKT were involved in the conception and design of this study and  
507 collection of data. TD analysed and interpreted the data and drafted the manuscript. All authors  
508 were involved in critically reviewing the paper. All authors read and approved the final  
509 manuscript.

510

511
